# Supplementary material for: A novel locus for mycelial aggregation forms a gateway to improved Streptomyces cell factories
Source: PubMed Central journal article supplement (PMC4391728; doi:10.1186/s12934-015-0224-6), 2015-04-01
Supplement: 12934_2015_224_MOESM1_ESM.pdf [file 12934_2015_224_MOESM1_ESM.pdf]

**ADDITIONAL FILE 1: Supplemental Information**

belonging to the manuscript

**A novel locus for mycelial aggregation forms a gateway to improved *Streptomyces* cell factories**

by

Dino van Dissel<sup>1</sup>, Dennis Claessen<sup>1</sup>, Martin Roth<sup>2</sup>, and Gilles P. van Wezel<sup>1,\*</sup>

<sup>1</sup>Molecular Biotechnology, Institute of Biology, Leiden University, PO Box 9505, 2300RA, Leiden, The Netherlands;

<sup>2</sup> Bio Pilot Plant, Leibniz Institute for Natural Product Research and Infection Biology, Hans Knöll Institute, Adolf-Reichwein-Str. 23, 07745 Jena, Germany

# To whom correspondence should be addressed. Tel: +3171527430; email: g.wezel@biology.leidenuniv.nl

**Running title:** Morphological engineering of *Streptomyces*

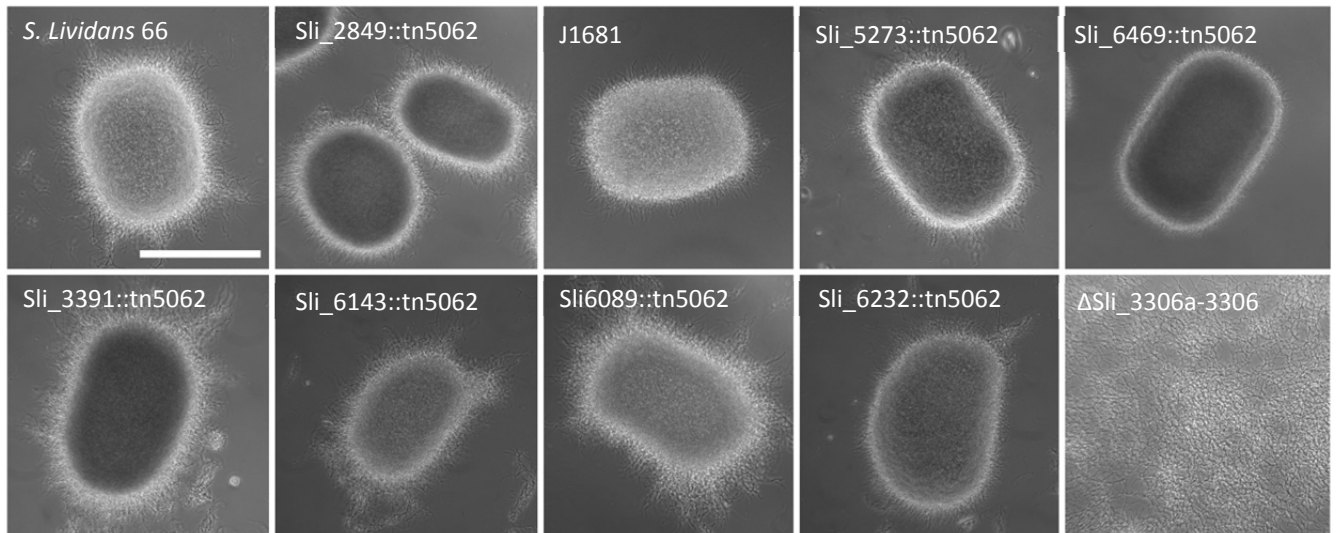

**Figure S1. Phenotypes of disruption mutants of *S. lividans* in submerged cultures.**

Sli\_2849, Sli\_5273, Sli\_6469, Sli\_3391, Sli\_6143, Sli\_6089 and Sli\_6232 were disrupted by a transposon insertion. The region of Sli\_3306a-Sli\_3306 was removed by homologous recombination replacement. J1681 (*S. coelicolor*  $\Delta bldA$ ) was published previously [1].

Cultures were grown in baffled shake flasks in TSBS for 48 h. Scale bar, 200  $\mu$ m.

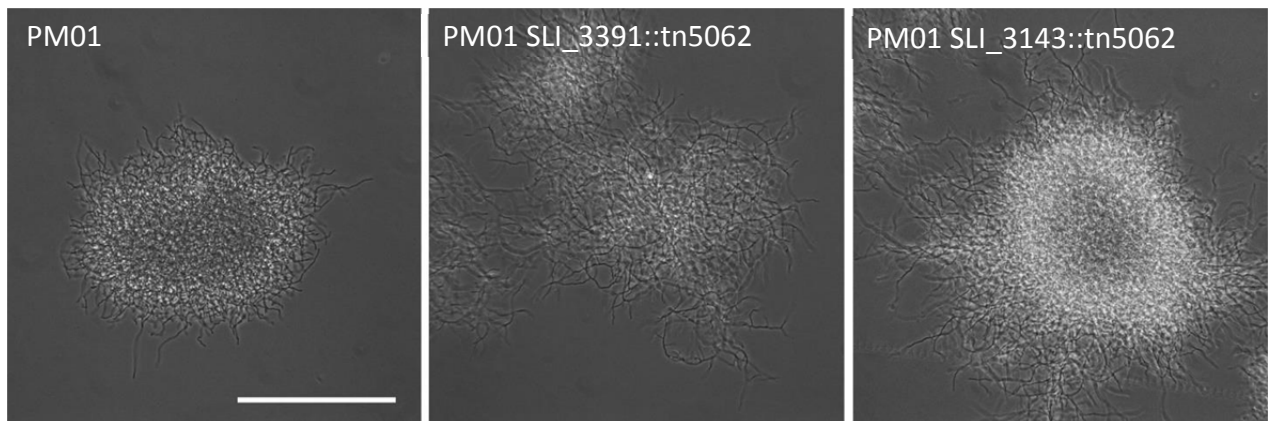

**Figure S2: Identification of suppressor mutations in *S. lividans* PM01 and PM02.**

SLI\_3391 and SLI\_6143 were identified by SNP analysis as the major changes during evolution of PM02 from PM01. Note that mutation of SLI\_3391 enhanced dispersed growth of PM01, giving a phenotype similar to that observed for PM02. Scale bar, 100  $\mu$ m.

**Table S1. Bacterial strains.**

| Strain                                 | Description and genotype                                                    | Reference  |
|----------------------------------------|-----------------------------------------------------------------------------|------------|
| <i>Streptomyces lividans</i> 66 (1326) | SLP2+ SLP3+                                                                 | [2]        |
| PM01                                   | Evolved from <i>S.lividans</i> 66                                           | [3]        |
| PM02                                   | Evolved from PM01                                                           | [4]        |
| J1681                                  | J1501 $\Delta bldA$                                                         | [1]        |
| GAD01                                  | <i>S. lividans</i> 66 $\Delta SLI\_3306a::aacC4$ Apr <sup>R</sup>           | This study |
| GAD02                                  | <i>S. lividans</i> 66 $\Delta SLI\_3306a^{clean}$                           | This study |
| GAD03                                  | <i>S. coelicolor</i> M145 $\Delta SCO2962::aacC4$ Apr <sup>R</sup>          | This study |
| GAD04                                  | <i>S. lividans</i> 66 $\Delta SLI\_3306a-Sli\_3306::aacC4$ Apr <sup>R</sup> | This study |
| GAD05                                  | <i>S. lividans</i> 66 $\Delta SLI\_3306a-SLI3306^{clean}$                   | This study |

IFD, in-frame deletion mutant;  
Apr<sup>R</sup> apramycin resistant.

**Table S2. Transposon-mediated gene-replacement cosmids.** Cosmid nomenclature refers to the *Streptomyces coelicolor* genome database (strepdb.streptomyces.org.uk). The genomic location of the insertion of the apramycin cassette is given for the *S. coelicolor* genome.

| Cosmid name  | target gene | Cosmids location in genome | Start gene | position relative to start |
|--------------|-------------|----------------------------|------------|----------------------------|
| SC17.2.C04   | SCO1907     | 2043368                    | 2044163    | 795                        |
| C121.1.E05   | SCO2513     | 2709849                    | 2709485    | 364                        |
| E34.2.E04    | SCO3043     | 3331409                    | 3331178    | 231                        |
| 2SCK36.1.F01 | SCO4998     | 5437068                    | 5437222    | 154                        |
| SC5B8.1.F05  | SCO5821     | 6369817                    | 6369367    | 450                        |
| SC2E9.1.F02  | SCO5871     | 6426513                    | 6426319    | 194                        |
| 7H1.2.H01    | SCO5952     | 6521053                    | 6520547    | 506                        |
| SC9B1.2.C03  | SCO6076     | 6670727                    | 6670057    | 670                        |

**Table S3. Plasmids and constructs.**

| Plasmid or construct | Description                                                                                                                                                 | Reference |
|----------------------|-------------------------------------------------------------------------------------------------------------------------------------------------------------|-----------|
| pWHM3                | Cloning vector, <i>colE1</i> replicon, <i>pSG5</i> replicon, Thio <sup>R</sup> , Amp <sup>R</sup>                                                           | [5]       |
| pSET152              | Complementation vector, <i>oriT</i> RK2, pUC18 replicon, Apra <sup>R</sup>                                                                                  | [6]       |
| pUWLcre              | pUWLoriT derivative with <i>creA</i> gene under ermE* promoter, Thio <sup>R</sup>                                                                           | [7]       |
| pMAT1                | pWHM3 containing flanking regions of <i>S. coelicolor</i> SCO2963 and SCO2962 with a <i>aac(3)IV-loxP</i> XbaI inserted between them in pWHM3 EcoRI-HindIII | this work |
| pMAT2                | pWHM3 containing flanking regions of <i>S. coelicolor</i> SCO2963 with a <i>aac(3)IV-loxP</i> XbaI inserted between them in pWHM3 EcoRI-HindIII             | this work |
| pMAT3                | Cosmid StE59 derivative in which the <i>matB</i> coding sequence was replaced by the <i>aac(3)IV</i> resistance cassette                                    | this work |
| pMAT4                | pSET152 containing SCO2963 with the 500bp upstream (promoter) region                                                                                        | this work |

**Table S4. Oligonucleotides.**

| Name              | Primer Sequence ^                                            |
|-------------------|--------------------------------------------------------------|
| matB_+2190        | AGTCTCTAGAAAGCCGGTTCGGATGACCACC                              |
| matB_+3610        | AGTCAAGCTTCCCTGTTCACCTCCCGCAACCG                             |
| matA_-1326        | AGTCGAATTCCAGCCGGGCGGTGAGATTCC                               |
| matA_+43          | ACTGTCTAGACGAGCACTCGTCGGCCGAAC                               |
| matA_2809         | AGTCAAGCTTAGACGGTGTTCGCCGTCCATC                              |
| matA_+1466        | ACTGTCTAGACCCCGGAGAACACCCTCTGATGG                            |
| matA_-54          | TTCTTTGCCTGAGCACGGTGTGATAC                                   |
| matB_+1528        | TGGTACAGGACCACCCGGAAGAG                                      |
| pmatA_-537        | AGCTGAATTCGGCGCGTTACGAGAGCGGACTGAC                           |
| matA_1485         | GATCTCTAGATCAGAGGGTGTTCCTCCGGGACAG                           |
| matB_FW_REDIRECT  | CCGGGGTTCGGCCCGTTCGGTTCGTACGGCGGGGTGGTCATGTAGGCTGGAGCTGCTTC  |
| matB_REV_REDIRECT | CCCCTCCCTCCCCCTGTCCCCGGAGAACACCCTCTGATGATTCCGGGGATCCGTTCGACC |

^Restriction sites are underlined. TCTAGA, XbaI; AAGCTT, HindIII; GAATTC, EcoRI.

## References

1. Leskiw BK, Bibb MJ, Chater KF. **The use of a rare codon specifically during development?** *Mol Microbiol* 1991, **5**:2861-7.
2. Kieser T, Bibb MJ, Buttner MJ, Chater KF, Hopwood DA. **Practical *Streptomyces* genetics**. 2000.
3. Roth M, Noack D, Geuther R. **Maintenance of the recombinant plasmid pIJ2 in chemostat cultures of *Streptomyces lividans* 66 (pIJ2)**. *J Basic Microbiol* 1985, **25**:265-71
4. Roth M, Hoffmeier C, Geuther R, Muth G, Wohlleben W. **Segregational stability of pSG5-derived vector plasmids in continuous cultures of *Streptomyces lividans* 66**. *Biotechnol Lett* 1994, **16**:1225-30.
5. Vara J, Lewandowska-Skarbek M, Wang YG, Donadio S, Hutchinson CR. **Cloning of genes governing the deoxysugar portion of the erythromycin biosynthesis pathway in *Saccharopolyspora erythraea* (*Streptomyces erythreus*)**. *J Bacteriol* 1989, **171**:5872-81.
6. Bierman M, Logan R, O'Brien K, Seno ET, Rao RN, Schonher BE. **Plasmid cloning vectors for the conjugal transfer of DNA from *Escherichia coli* to *Streptomyces* spp**. *Gene* 1992, **116**:43-9.
7. Fedoryshyn M, Welle E, Bechthold A, Luzhetskyy A. **Functional expression of the Cre recombinase in actinomycetes**. *Appl Microbiol Biotechnol* 2008, **78**:1065-70.
